# Supplementary material for: Transcriptome analysis of rice (Oryza sativa L.) shoots responsive to cadmium stress
Source: PubMed Central journal article supplement (PMC6629703; doi:10.1038/s41598-019-46684-w), 2019-07-15
Supplement: 41598_2019_46684_MOESM1_ESM.pdf [file 41598_2019_46684_MOESM1_ESM.pdf]

# Transcriptome analysis of rice (*Oryza sativa* L.) shoots responsive to cadmium stress

Lijuan Sun<sup>1, 2, 3, 4, 5</sup>, Jun Wang<sup>1, 6</sup>, Ke Song<sup>1, 2, 3, 4, 5</sup>, Yafei Sun<sup>1, 2, 3, 4, 5</sup>, Qin Qin<sup>1, 2, 3, 4, 5\*</sup>, Yong Xue<sup>1, 2, 3, 4,</sup>

5\*

Table S1 Primer information for qRT-PCR

| Gene id      | Forward (5'-3')        | Reverse (5'-3')        |
|--------------|------------------------|------------------------|
| actin        | GCTTGCATACGTCGCTCTTG   | GCTTCCATGCCGATGAGAGA   |
| OS01G0976300 | TCCTTGGACATCGACATCGC   | CAAGCAGTAAGCAGGGTGGGA  |
| OS11G0587600 | TGGGCTATCCAGTTGGGAGT   | AGGTGAGAGCCCCAAGGAAT   |
| OS04G0675101 | ACGAGGAGCCCTGGAGTATT   | CCTGGTAGACGAACGACAGG   |
| OS01G0609200 | TGCTACTTGCTTTGGCTGGA   | CGTGCCGAGAATGAGAGTGT   |
| OS01G0974200 | GACCACCTTCCTTGCCGATG   | AGCACCAGACCTGCAATCG    |
| OS05G0178300 | TAGCCACTGCATATCTTCCAGC | TGTCATCTCCTGGGCACTTG   |
| OS01G0880200 | TCTGGGAGAGCATGTTATGGC  | GCTACCTTTACAAGCTGTTGCT |
| OS01G0695800 | TAGCGACGAGGGAGCGATAA   | TGGGAAGGAATGTGCAAGGT   |
| OS10G0529500 | ATGAAGCAGATGTTCGTCGC   | AAGCATCCCTTCCCCTTGGA   |
| OS01G0885000 | GCATACCTGAAGAACGCCAC   | GAGCTGCACATCGTCTCTTC   |
| OS05G0198400 | GTCGTGGTGTTCGCAGATACT  | AGAACTGGTGGAACGAGAGC   |
| OS01G0770700 | GGAGGACCGCAAGAACGAC    | CATCAAACCAACGTCCACCG   |
| OS01G0612500 | TTTGCCCTACTGCACCAACA   | TATCATCACGGCCATCCACG   |
| OS01G0842600 | GGAGGACCGCAAGAACGAC    | CATCAAACCAACGTCCACCG   |
| OS02G0805100 | GACCAAACCGGCGAGAAGAA   | TGCTCCATCAACTCACGCAT   |
| OS08G0109400 | CCACAAAAACCCAACCCACC   | TCATCTCGCAGTCCATGTCG   |
| OS05G0230700 | GAGCCGCAAGGATGGTGAAT   | AACATCGCCAACAAGCATCC   |
| OS07G0182400 | TGATGGCTTGTGCTCTTCGT   | TCCAGCCTTCGCTCATACAG   |

Table S2 RNAseq results4 of the 7 selected DEGs

| No. | Gene ID      | Description                                                             | Group     | Direction | P Value     | Fold change |
|-----|--------------|-------------------------------------------------------------------------|-----------|-----------|-------------|-------------|
| 1   | OS01G0976300 | Heavy metal transport/detoxification protein domain containing protein. | CK vs. Cd | Down      | 5.14136E-07 | 0.361742209 |
| 2   | OS11G0587600 | Similar to PDR-like ABC transporter.                                    | CK vs. Cd | Down      | 4.47683E-08 | 0.148739417 |
| 3   | OS04G0675101 | ATPase-like, ATP-binding domain containing protein.                     | CK vs. Cd | Down      | 0.005668237 | 0.451707915 |
| 4   | OS01G0609200 | ABC transporter G family member 35                                      | CK vs. Cd | Down      | 0.000279748 | 0.26565129  |
| 5   | OS01G0974200 | Metallothionein-like protein 2B.                                        | CK vs. Cd | Up        | 1.95361E-06 | 2.119526089 |
| 6   | OS05G0178300 | Similar to Cadmium tolerant 1.                                          | CK vs. Cd | Up        | 0.000617189 | 2.22524925  |
| 7   | OS01G0880200 | Glycosyl transferase, family 8 protein.                                 | CK vs. Cd | Up        | 1.54186E-11 | 3.669264729 |
| 8   | OS02G0805100 | Auxin-responsive protein IAA9                                           | A vs. B   | Up        | 0.034260966 | 2.444770548 |
| 9   | OS08G0109400 | Auxin-responsive protein IAA25                                          | A vs. B   | Up        | 8.71948E-14 | 2.692006093 |
| 10  | OS05G0230700 | Auxin-responsive protein IAA17                                          | A vs. B   | Up        | 7.94477E-10 | 2.164617854 |
| 11  | OS07G0182400 | Auxin-responsive protein IAA24                                          | A vs. B   | Up        | 0.005182159 | 2.028183238 |

**Table S3** Eleven major significantly enriched pathways and related genes identified by KEGG enrichment analysis

| Pathway                        | KO           | Metabolism/gene id | Expression<br>under Cd<br>stress | Name                                      | Annotation                                                                                                               |
|--------------------------------|--------------|--------------------|----------------------------------|-------------------------------------------|--------------------------------------------------------------------------------------------------------------------------|
| <b>Signal<br/>transduction</b> | K14484       | OS02G0805100       | up                               | IAA9                                      | Auxin-responsive protein IAA9                                                                                            |
|                                | K14509       | OS05G0155200       | up                               |                                           | Similar to Ethylene receptor.                                                                                            |
| ko04075                        | K14432       | OS01G0813100       | up                               |                                           | Similar to FD-like 2 protein (Fragment).                                                                                 |
|                                | K14484       | OS08G0109400       | up                               | IAA25                                     | Auxin-responsive protein IAA25                                                                                           |
|                                | K14484       | OS05G0230700       | up                               | IAA17                                     | Auxin-responsive protein IAA17                                                                                           |
|                                | K14431       | OS10G0566200       | up                               |                                           | Similar to predicted protein.                                                                                            |
|                                | K14498       | OS04G0432000       | up                               |                                           | Serine/threonine-protein kinase SAPK7                                                                                    |
|                                | K14484       | OS07G0182400       | up                               | IAA24                                     | Auxin-responsive protein IAA24                                                                                           |
|                                | K14496       | OS05G0473000       | Down                             |                                           | Streptomyces cyclase/dehydrase family protein.                                                                           |
|                                | K14488       | OS06G0671150       | Down                             |                                           | Auxin responsive SAUR protein family protein.                                                                            |
|                                | K13449       | OS07G0127500       | Down                             |                                           | -                                                                                                                        |
|                                | K13449       | OS07G0129300       | Down                             |                                           | -                                                                                                                        |
|                                | K14516       | OS03G0860100       | Down                             |                                           | Similar to Ethylene-responsive transcription factor 2 (Ethylene-responsive element binding factor 2) (EREBP-2) (AtERF2). |
|                                | K13464       | OS10G0392400       | Down                             |                                           | Protein TIFY 11d                                                                                                         |
|                                | K13464       | OS10G0391400       | Down                             |                                           | Protein TIFY 11e                                                                                                         |
|                                | K14431       | OS06G0614100       | Down                             |                                           | bZIP transcription factor, bZIP-1 domain containing protein.                                                             |
|                                | K14431       | OS02G0194900       | Down                             |                                           | Basic-leucine zipper (bZIP) transcription factor domain containing protein.                                              |
| K13449                         | OS07G0127600 | Down               | S                                | Allergen V5/Tpx-1 related family protein. |                                                                                                                          |
| K13464                         | OS03G0180800 | Down               |                                  | Similar to ZIM motif family protein.      |                                                                                                                          |
| K13464                         | OS03G0181100 | Down               |                                  | Protein TIFY 11b                          |                                                                                                                          |

|                                                                        |              |              |      |                                           |                                                                                                                   |
|------------------------------------------------------------------------|--------------|--------------|------|-------------------------------------------|-------------------------------------------------------------------------------------------------------------------|
|                                                                        | K13464       | OS03G0180900 | Down |                                           | Protein TIFY 11c                                                                                                  |
|                                                                        | K13464       | OS04G0395800 | Down |                                           | Protein TIFY 9                                                                                                    |
| <b>Biosynthesis of<br/>other secondary<br/>metabolites<br/>ko00940</b> | K00430       | OS07G0677400 | Up   |                                           | Peroxidase.                                                                                                       |
|                                                                        | K00430       | OS07G0676900 | Up   |                                           | Similar to Peroxidase (EC 1.11.1.7).                                                                              |
|                                                                        | K01188       | OS05G0365600 | Up   | G                                         | Beta-glucosidase 19                                                                                               |
|                                                                        | K01188       | OS01G0930800 | Up   | G                                         | Beta-glucosidase 5                                                                                                |
|                                                                        | K01904       | OS10G0578950 | Up   |                                           | Similar to 4-coumarate--CoA ligase-like 2.                                                                        |
|                                                                        | K05350       | OS01G0508000 | Up   | G                                         | Beta-glucosidase 1                                                                                                |
|                                                                        | K00430       | OS09G0471100 | Up   |                                           | Peroxidase 17                                                                                                     |
|                                                                        | K01188       | OS06G0683300 | Up   |                                           | Similar to Beta-glucosidase.                                                                                      |
|                                                                        | K01188       | OS04G0474800 | Down |                                           | -                                                                                                                 |
|                                                                        | K01188       | OS04G0474800 | Down |                                           | Beta-glucosidase 22                                                                                               |
|                                                                        | K01188       | OS05G0366600 | Down |                                           | -                                                                                                                 |
|                                                                        | K00083       | OS09G0399800 | Down | C                                         | Probable cinnamyl alcohol dehydrogenase 8A                                                                        |
|                                                                        | K00083       | OS09G0400400 | Down | C                                         | Probable cinnamyl alcohol dehydrogenase 8D                                                                        |
|                                                                        | K00083       | OS10G0194200 | Down | C                                         | Probable cinnamyl alcohol dehydrogenase 1                                                                         |
|                                                                        | K00083       | OS02G0187800 | Down | C                                         | Cinnamyl alcohol dehydrogenase 2                                                                                  |
|                                                                        | K09755       | OS10G0512400 | Down |                                           |                                                                                                                   |
|                                                                        | K01904       | OS02G0177600 | Down |                                           | Similar to 4-coumarate--CoA ligase 1 (EC 6.2.1.12) (4CL 1) (4-coumaroyl-CoA synthase 1) (Clone 4CL14) (Fragment). |
|                                                                        | K01904       | OS08G0448000 | Down |                                           | Probable 4-coumarate--CoA ligase 5                                                                                |
|                                                                        | K13064       | OS02G0626100 | Down |                                           | Phenylalanine ammonia-lyase                                                                                       |
|                                                                        | K05349       | OS03G0749300 | Down |                                           | -                                                                                                                 |
| K00487                                                                 | OS05G0320700 | Down         |      | Similar to Cytochrome P450.               |                                                                                                                   |
| K00487                                                                 | OS02G0467600 | Down         |      | Similar to Cinnamate 4-hydroxylase CYP73. |                                                                                                                   |
| K13066                                                                 | OS12G0202700 | Down         |      | Similar to N-methyltransferase.           |                                                                                                                   |

|                   |        |              |      |                                                                 |
|-------------------|--------|--------------|------|-----------------------------------------------------------------|
|                   | K09753 | OS08G0441500 | Down | Similar to Cinnamoyl-CoA reductase.                             |
|                   | K09753 | OS09G0127300 | Down | NAD(P)-binding domain containing protein.                       |
|                   | K00430 | OS01G0963000 | Down | Similar to Peroxidase BP 1 precursor.                           |
|                   | K00430 | OS01G0327000 | Down | -                                                               |
|                   | K00430 | OS03G0235000 | Down | Similar to Peroxidase.                                          |
|                   | K00430 | OS04G0688500 | Down | Peroxidase (EC 1.11.1.7).                                       |
|                   | K00430 | OS04G0688200 | Down | Similar to Peroxidase (EC 1.11.1.7).                            |
|                   | K00430 | OS04G0688100 | Down | -                                                               |
|                   | K00430 | OS05G0162000 | Down | Similar to Peroxidase (Fragment).                               |
|                   | K00430 | OS08G0113000 | Down | -                                                               |
|                   | K00430 | OS10G0109600 | Down | -                                                               |
|                   | K00430 | OS11G0210100 | Down | Similar to Class III peroxidase 133.                            |
|                   | K00430 | OS11G0112200 | Down | Similar to Class III peroxidase 136                             |
|                   | K10775 | OS02G0627100 | Down | Phenylalanine ammonia-lyase                                     |
|                   | K10775 | OS02G0626400 | Down | -                                                               |
|                   | K10775 | OS05G0427400 | Down | Similar to Phenylalanine ammonia-lyase.                         |
|                   | K09754 | OS05G0494000 | Down | -                                                               |
|                   | K13065 | OS04G0500700 | Down | Similar to Hydroxyanthranilate hydroxycinnamoyltransferase 3.   |
| <b>Energy</b>     | K02638 | OS06G0101600 | Up   | Plastocyanin, chloroplastic                                     |
| <b>metabolism</b> | K08901 | OS07G0544800 | Up   | Oxygen-evolving enhancer protein 3, chloroplastic               |
| ko00195           | K08901 | OS07G0105600 | Up   | Photosynthetic NDH subunit of lumenal location 3, chloroplastic |
|                   | K08901 | OS02G0578400 | Up   | Photosynthetic NDH subunit of lumenal location 2, chloroplastic |
|                   | K02695 | OS05G0560000 | Up   | Photosystem I reaction center subunit VI, chloroplastic         |
|                   | K02692 | OS08G0560900 | Up   | -                                                               |
|                   | K02698 | OS07G0148900 | Up   | Photosystem I reaction center subunit psaK, chloroplastic       |
|                   | K08905 | OS09G0481200 | Up   | Photosystem I reaction center subunit V, chloroplastic          |

|                                                 |        |              |      |                                                          |
|-------------------------------------------------|--------|--------------|------|----------------------------------------------------------|
|                                                 | K02693 | OS07G0435300 | Up   | -                                                        |
|                                                 | K02694 | OS03G0778100 | Up   | Photosystem I reaction center subunit III,chloroplastic  |
|                                                 | K02699 | OS12G0420400 | Up   | Photosystem I reaction center subunit XI,chloroplastic   |
|                                                 | K02701 | OS12G0189400 | Up   | -                                                        |
|                                                 | K14332 | OS04G0414700 | Up   | Photosystem I subunit O                                  |
|                                                 | K03541 | OS07G0147500 | Down | -                                                        |
|                                                 | K02641 | OS07G0147900 | Down | Ferredoxin--NADP reductase, embryo isozyme,chloroplastic |
|                                                 | K02639 | OS03G0835900 | Down | -                                                        |
| <b>Metabolism of terpenoids and polyketides</b> | K04125 | OS05G0560900 | Up   | Similar to gibberellin 2-beta-dioxygenase.               |
|                                                 | K16084 | OS02G0569900 | Down | Cytochrome P450 family protein.                          |
|                                                 | K16084 | OS06G0599200 | Down | Ent-cassadiene C11-alpha-hydroxylase 1                   |
| ko00904                                         | K16085 | OS04G0178400 | Down | 9-beta-pimara-7,15-diene oxidase                         |
|                                                 | K14046 | OS04G0179700 | Down | Syn-pimara-7,15-diene synthase                           |
|                                                 | K14037 | OS12G0491800 | Down | Ent-sandaracopimara-8(14),15-diene synthase              |
|                                                 | K04120 | OS02G0570900 | Down | Similar to Ent-copalyl diphosphate synthase 2.           |
|                                                 | K04120 | OS02G0571100 | Down | Terpenoid synthase domain containing protein.            |
|                                                 | K04120 | OS04G0178300 | Down | -                                                        |
|                                                 | K14036 | OS02G0570400 | Down | Ent-cassa-12,15-diene synthase                           |
|                                                 | K04122 | OS06G0569500 | Down | Ent-sandaracopimaradiene 3-hydroxylase                   |
|                                                 | K04122 | OS06G0568600 | Down | Ent-kaurene oxidase-like 5                               |
|                                                 | K04121 | OS11G0474800 | Down | Similar to Isoform 2 of Stemar-13-ene synthase.          |
| <b>Amino acid metabolism</b>                    | K15227 | OS06G0708832 | Up   | -                                                        |
|                                                 | K01695 | OS07G0182100 | Down | -                                                        |

|                            |              |              |                                                                            |                                                                                                                                                              |
|----------------------------|--------------|--------------|----------------------------------------------------------------------------|--------------------------------------------------------------------------------------------------------------------------------------------------------------|
| ko00400                    | K01609       | OS08G0320400 | Down                                                                       | -                                                                                                                                                            |
|                            | K01609       | OS09G0255400 | Down                                                                       | Similar to Indole-3-glycerol phosphate synthase, chloroplast precursor (EC 4.1.1.48) (IGPS).                                                                 |
| <b>Overview</b><br>ko01230 | K00800       | OS06G0133900 | Down                                                                       | -                                                                                                                                                            |
|                            | K00891       | OS06G0225800 | Down                                                                       | -                                                                                                                                                            |
|                            | K01850       | OS01G0764400 | Down                                                                       | Similar to Chorismate mutase, chloroplast precursor (EC 5.4.99.5) (CM-1).                                                                                    |
|                            | K15849       | OS01G0871300 | Down                                                                       | Bifunctional aspartate aminotransferase and glutamate/aspartate-prephenate aminotransferase                                                                  |
|                            | K01736       | OS03G0254800 | Down                                                                       | Chorismate synthase, chloroplastic                                                                                                                           |
|                            | K01658       | OS03G0718000 | Down                                                                       | Anthranilate synthase beta subunit 2, chloroplastic                                                                                                          |
|                            | K00766       | OS03G0126000 | Down                                                                       | Anthranilate phosphoribosyltransferase, chloroplastic                                                                                                        |
|                            | K05359       | OS04G0406600 | Down                                                                       | -                                                                                                                                                            |
|                            | K13832       | OS01G0375200 | Down                                                                       | Similar to shikimate biosynthesis protein aroDE.                                                                                                             |
|                            | K01626       | OS07G0622200 | Down                                                                       | Similar to M-160-u1_1 (Fragment).                                                                                                                            |
|                            | K01738       | OS01G0814800 | Up                                                                         | Similar to Cysteine synthase, chloroplast precursor (EC 2.5.1.47) (O-acetylserine sulfhydrylase) (O-acetylserine (Thiol)-lyase) (CSase B) (CS-B) (OAS-TL B). |
|                            | K01653       | OS02G0608550 | Up                                                                         | -                                                                                                                                                            |
|                            | K01807       | OS03G0781400 | Up                                                                         | Probable ribose-5-phosphate isomerase 4, chloroplastic                                                                                                       |
|                            | K00948       | OS03G0100040 | Up                                                                         | -                                                                                                                                                            |
|                            | K01623       | OS06G0608700 | Up                                                                         | Similar to Fructose-bisphosphate aldolase, cytoplasmic isozyme (EC 4.1.2.13).                                                                                |
|                            | K01623       | OS12G0169600 | Up                                                                         | Similar to Fructose-bisphosphate aldolase.                                                                                                                   |
|                            | K15227       | OS06G0708832 | Up                                                                         | -                                                                                                                                                            |
| K01609                     | OS08G0320400 | Down         | -                                                                          |                                                                                                                                                              |
| K01609                     | OS09G0255400 | Down         | Similar to Indole-3-glycerol phosphate synthase, chloroplast precursor (EC |                                                                                                                                                              |

---

|        |              |      |   |                                                                                                          |
|--------|--------------|------|---|----------------------------------------------------------------------------------------------------------|
|        |              |      |   | 4.1.1.48) (IGPS).                                                                                        |
| K00058 | OS08G0447000 | Down |   | Similar to D-3-phosphoglycerate dehydrogenase.                                                           |
| K00800 | OS06G0133900 | Down |   | -                                                                                                        |
| K15849 | OS01G0871300 | Down |   | Bifunctional aspartate aminotransferase and glutamate/aspartate-prephenate aminotransferase              |
| K00766 | OS03G0126000 | Down |   | Anthranilate phosphoribosyltransferase, chloroplastic                                                    |
| K01658 | OS03G0718000 | Down | E | Anthranilate synthase beta subunit 2, chloroplastic                                                      |
| K00789 | OS01G0323600 | Down | H | S-adenosylmethionine synthase 2                                                                          |
| K00789 | OS05G0135700 | Down | H | S-adenosylmethionine synthase 1                                                                          |
| K00615 | OS04G0266900 | Down | G | Transketolase C-terminal-like domain containing protein.                                                 |
| K01647 | OS02G0194100 | Down |   | -                                                                                                        |
| K00831 | OS03G0157900 | Down |   | -                                                                                                        |
| K01623 | OS01G0118000 | Down |   | Similar to Fructose-bisphosphate aldolase (EC 4.1.2.13) (Fragment).                                      |
| K13832 | OS01G0375200 | Down |   | Similar to shikimate biosynthesis protein aroDE.                                                         |
| K00873 | OS01G0660300 | Down |   | Similar to Pyruvate kinase.                                                                              |
| K01626 | OS07G0622200 | Down |   | Similar to M-160-u1_1 (Fragment).                                                                        |
| K00549 | OS12G0623900 | Down | E | 5-methyltetrahydropteroyltriglutamate--homocysteinemethyltransferase 1                                   |
| K01695 | OS07G0182100 | Down |   | -                                                                                                        |
| K00826 | OS03G0231600 | Down |   | Similar to Branched-chain-amino-acid aminotransferase 3, chloroplast precursor (EC 2.6.1.42) (Atbcat-3). |
| K00891 | OS06G0225800 | Down |   | -                                                                                                        |
| K00930 | OS02G0657600 | Down | E | N-acetyl glutamate kinase 2.                                                                             |
|        |              | Down |   |                                                                                                          |
|        |              | Down |   |                                                                                                          |

---



---

|                                |        |              |      |                                                                                                                           |
|--------------------------------|--------|--------------|------|---------------------------------------------------------------------------------------------------------------------------|
|                                |        |              | Down |                                                                                                                           |
|                                |        |              | Down |                                                                                                                           |
|                                |        |              | Down |                                                                                                                           |
| <b>Lipid metabolism</b>        | K00454 | OS05G0304600 | Up   | Similar to Lipoxygenase (Fragment).                                                                                       |
| ko00592                        | K00232 | OS06G0347100 | Up   | K00232                                                                                                                    |
|                                | K01047 | OS03G0708000 | Up   | Phospholipase A2 homolog 3                                                                                                |
|                                | K07513 | OS10G0457600 | Down | Similar to Acetyl-CoA C-acyltransferase (3-ketoacyl-coa thiolase b) (EC 2.3.1.16) (Fragment).                             |
|                                | K00232 | OS06G0354500 | Down | Similar to Acyl-coenzyme A oxidase 3, peroxisomal precursor (EC 1.3.3.6) (AOX 3) (Medium-chain acyl-CoA oxidase) (AtCX3). |
|                                | K00454 | OS08G0509100 | Down | Probable lipoxygenase 8, chloroplastic                                                                                    |
|                                | K01723 | OS03G0225900 | Down | Allene oxide synthase 2                                                                                                   |
|                                | K18857 | OS11G0210500 | Down | Alcohol dehydrogenase 2                                                                                                   |
|                                | K10529 | OS12G0448900 | Down | Alpha-dioxygenase 1                                                                                                       |
|                                | K01723 | OS02G0218700 | Down | Allene oxide synthase 3                                                                                                   |
|                                | K00454 | OS08G0508800 | Down | Lipoxygenase 7, chloroplastic                                                                                             |
| <b>Carbohydrate metabolism</b> | K01623 | OS06G0608700 | Up   | Similar to Fructose-bisphosphate aldolase, cytoplasmic isozyme (EC 4.1.2.13).                                             |
| ko00030                        | K01807 | OS03G0781400 | Up   | Probable ribose-5-phosphate isomerase 4, chloroplastic                                                                    |
|                                | K01835 | OS10G0189100 | Up   | Phosphoglucomutase, chloroplastic                                                                                         |
|                                | K00948 | OS03G0100040 | Up   | -                                                                                                                         |
|                                | K03841 | OS01G0866400 | Up   | -                                                                                                                         |
|                                | K03841 | OS06G0664200 | Up   | -                                                                                                                         |
|                                | K01623 | OS12G0169600 | Up   | Similar to Fructose-bisphosphate aldolase.                                                                                |
|                                | K00036 | OS02G0600400 | Down | Similar to Glucose-6-phosphate dehydrogenase.                                                                             |
|                                | K00615 | OS04G0266900 | Down | Transketolase C-terminal-like domain containing protein.                                                                  |

---

|                         |        |              |      |     |                                                                              |
|-------------------------|--------|--------------|------|-----|------------------------------------------------------------------------------|
|                         | K00033 | OS06G0111500 | Down |     | 6-phosphogluconate dehydrogenase, decarboxylating 1                          |
|                         | K01623 | OS01G0118000 | Down |     | Similar to Fructose-bisphosphate aldolase (EC 4.1.2.13) (Fragment).          |
| <b>Environmental</b>    | K18835 | OS08G0499300 | Up   |     | -                                                                            |
| <b>adaptation</b>       | K13413 | OS06G0191300 | Up   |     | Similar to Mitogen-activated protein kinase kinase 4 (Fragment).             |
| ko04626                 | K02183 | OS09G0458800 | Up   |     | EF hand domain containing protein.                                           |
|                         | K13447 | OS01G0360200 | Up   |     | Respiratory burst oxidase homolog protein B                                  |
|                         | K13448 | OS05G0147300 | Up   |     | Probable calcium-binding protein CML22                                       |
|                         | K13448 | OS01G0955100 | Down |     | Similar to Calmodulin-like protein (Fragment).                               |
|                         | K13448 | OS03G0331700 | Down |     | Probable calcium-binding protein CML27                                       |
|                         | K13448 | OS05G0312600 | Down | T   | Probable calcium-binding protein CML21                                       |
|                         | K13448 | OS08G0558100 | Down |     | Probable calcium-binding protein CML48                                       |
|                         | K13448 | OS08G0558100 | Down |     | Similar to Polcalcin Phl p 7 (Calcium-binding pollen allergen Phl p 7) (P7). |
|                         | K13448 | OS11G0141400 | Down |     | -                                                                            |
|                         | K13448 | OS12G0603800 | Down | DTZ | Calmodulin-like protein 5                                                    |
|                         | K13448 | OS12G0138050 | Down |     | -                                                                            |
|                         | K13449 | OS07G0127500 | Down |     | -                                                                            |
|                         | K13449 | OS07G0127600 | Down | S   | Allergen V5/Tpx-1 related family protein.                                    |
|                         | K13449 | OS07G0129300 | Down |     | -                                                                            |
|                         | K13412 | OS03G0788500 | Down |     | -                                                                            |
|                         | K13459 | OS01G0956800 | Down |     | Hypothetical conserved gene.                                                 |
|                         | K13459 | OS04G0514600 | Down |     | -                                                                            |
|                         | K13457 | OS06G0698812 | Down |     | Disease resistance protein domain containing protein.                        |
| <b>Digestive system</b> | K14685 | OS06G0560000 | Up   |     | Solute carrier family 40 member 1                                            |
| ko04978                 | K00522 | OS11G0106700 | Down |     | -                                                                            |
|                         | K00522 | OS12G0106000 | Down |     | -                                                                            |
| <b>Endocrine system</b> | K00232 | OS06G0347100 | Up   |     | Similar to Acyl-coenzyme A oxidase 4, peroxisomal (EC 1.3.3.6) (AOX 4)       |

|         |        |              |      |   |                                                                          |
|---------|--------|--------------|------|---|--------------------------------------------------------------------------|
| ko03320 |        |              |      |   | (Short- chain acyl-CoA oxidase) (SAOX) (AtCX4) (G6p) (AtG6).             |
|         | K00232 | OS06G0354500 | Down |   | Similar to Acyl-coenzyme A oxidase 3, peroxisomal precursor (EC 1.3.3.6) |
|         | K07513 | OS10G0457600 | Down |   | (AOX 3) (Medium-chain acyl-CoA oxidase) (AtCX3).                         |
|         | K01897 | OS06G0158000 | Down |   | Similar to Acetyl-CoA C-acyltransferase (3-ketoacyl-coa thiolase b) (EC  |
|         | K01897 | OS01G0681200 | Down | I | 2.3.1.16) (Fragment).                                                    |
|         |        |              |      |   | Similar to Acyl-CoA synthetase (EC 6.2.1.3).                             |
|         |        |              |      |   | -                                                                        |

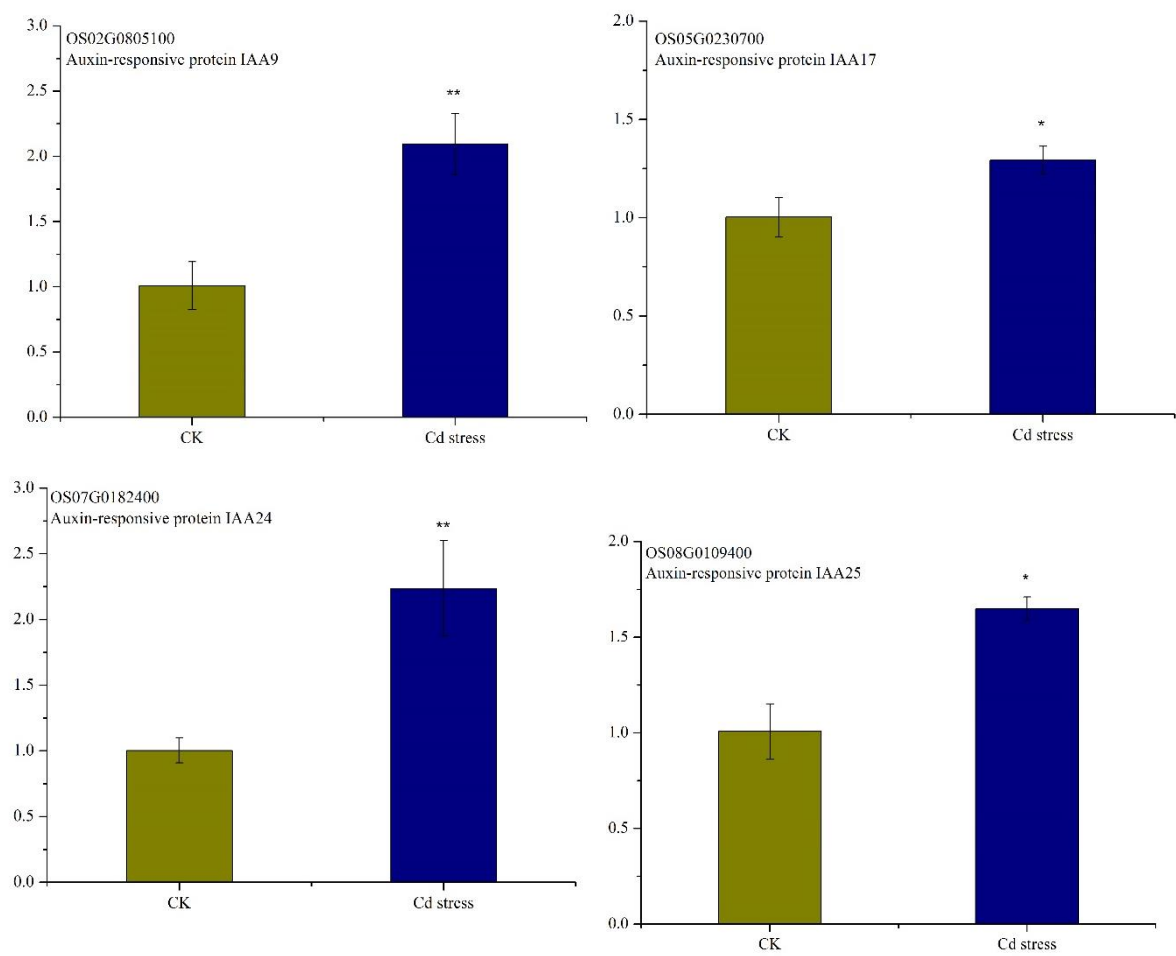

**Figure S1** The relative gene expression of 4 auxin-responsive protein genes examined by quantitative real-time PCR
